# Supplementary material for: PCR-Based Identification of Oral Streptococcal Species
Source: Hindawi journal article supplement (doi:10.1155/2016/3465163), 2016-01-01
Supplement: f1 [file 3465163.f1.pdf]

**TABLE S1 Highest Homology Scores for Each Gene of MLSA**

| GDH1+ | <i>map</i>            | <i>pfl</i>           | <i>ppaC</i>          | <i>pyk</i>           | <i>ropB</i>               | <i>sodA</i>          | <i>tuf</i>            | Species Assignment      |
|-------|-----------------------|----------------------|----------------------|----------------------|---------------------------|----------------------|-----------------------|-------------------------|
| 1     | VT162<br>(457)        | VT162<br>(540)       | VT162<br>(834)       | VT162<br>(343)       | Oralis<br>(774)           | I-P16<br>(138)       | VT162<br>(654)        | Strep sp. VT162         |
| 2     | Gordonii<br>(297)     | Gordonii<br>(408)    | Gordonii<br>(796)    | Mitis<br>(468)       | Gordonii<br>(618)         | Gordonii<br>(316)    | Gordonii<br>(609)     | <i>S. gordonii</i>      |
| 3     | VT162<br>(547)        | VT162<br>(533)       | VT162<br>(823)       | VT162<br>(508)       | Mitis<br>(755)            | VT162<br>(284)       | VT162/Oralis<br>(646) | Strep sp. VT162         |
| 4     | Oralis<br>(520)       | VT162<br>(522)       | VT162<br>(812)       | VT162<br>(444)       | VT162<br>(778)            | Oralis<br>(475)      | VT162<br>(655)        | Strep sp. VT162         |
| 5     | VT162<br>(522)        | VT162<br>(545)       | VT162<br>(780)       | VT162<br>(187)       | Oralis<br>(774)           | Oralis<br>(79)       | VT162<br>(590)        | Strep sp. VT162         |
| 6     | Gordonii<br>(482)     | Gordonii<br>(524)    | Gordonii<br>(783)    | < (50)               | Gordonii<br>(765)         | Gordonii<br>(394)    | Gordonii<br>(260)     | <i>S. gordonii</i>      |
| 7     | Oralis/VT162<br>(462) | VT162<br>(489)       | VT162<br>(785)       | VT162<br>(484)       | VT162<br>(756)            | VT162<br>(95)        | VT162<br>(661)        | Strep sp. VT162         |
| 8     | Oralis/VT162<br>(466) | Mitis<br>(499)       | VT162<br>(785)       | Mitis/VT162<br>(125) | VT162<br>(740)            | I-62/I-P16<br>(141)  | VT162<br>(621)        | Strep sp. VT162         |
| 9     | Oralis<br>(453)       | VT162<br>(482)       | VT162<br>(810)       | VT162<br>(581)       | VT162<br>(773)            | Oralis<br>(354)      | VT162<br>(646)        | Strep sp. VT162         |
| 10    | VT162<br>(219)        | VT162<br>(522)       | VT162<br>(787)       | VT162<br>(572)       | Oralis<br>(769)           | VT162<br>(154)       | VT162<br>(636)        | Strep sp. VT162         |
| 11    | Oralis/VT162<br>(482) | VT162<br>(511)       | VT162<br>(845)       | VT162<br>(605)       | Oralis<br>(747)           | VT162<br>(331)       | Oralis<br>(668)       | Strep sp. VT162         |
| 12    | Oralis/VT162<br>(489) | VT162<br>(491)       | VT162<br>(812)       | VT162<br>(601)       | Oralis<br>(747)           | Oralis<br>(443)      | Oralis<br>(664)       | <i>S. oralis</i> /VT162 |
| 13    | VT162<br>(544)        | VT162<br>(401)       | Oralis<br>(832)      | VT162<br>(641)       | Oralis<br>(147)           | Mitis<br>(123)       | VT162<br>(675)        | Strep sp. VT162         |
| 14    | VT162/Oralis<br>(401) | VT162<br>(513)       | Oralis<br>(215)      | VT162/Mitis<br>(565) | VT162<br>(159)            | Oralis<br>(86)       | VT162<br>(590)        | Strep sp. VT162         |
| 15    | Oralis<br>(464)       | Mitis<br>(489)       | VT162<br>(805)       | VT162<br>(563)       | VT162/Oralis<br>(416)     | Pneumoniae<br>(113)  | VT162<br>(616)        | Strep sp. VT162         |
| 16    | Intermedius<br>(544)  | Intermedius<br>(538) | Intermedius<br>(792) | Intermedius<br>(542) | Intermedius<br>(623)      | Intermedius<br>(156) | Intermedius<br>(655)  | <i>S. intermedius</i>   |
| 17    | VT162<br>(475)        | VT162<br>(509)       | VT162<br>(755)       | VT162<br>(668)       | Pseudopn./Oralis<br>(255) | VT162<br>(340)       | VT162<br>(663)        | Strep sp. VT162         |
| 18    | VT162<br>(508)        | VT162<br>(491)       | VT162<br>(780)       | VT162<br>(749)       | Oralis<br>(82)            | Oralis<br>(291)      | VT162<br>(654)        | Strep sp. VT162         |

|       |                       |                       |                       |                           |                           |                      |                        |                            |
|-------|-----------------------|-----------------------|-----------------------|---------------------------|---------------------------|----------------------|------------------------|----------------------------|
| 19    | VT162<br>(520)        | VT162<br>(504)        | VT162<br>(827)        | VT162<br>(603)            | VT162<br>(325)            | Oralis<br>(79)       | VT162/Oralis<br>(627)  | Strep sp. VT162            |
| 20    | Oralis<br>(479)       | VT162<br>(482)        | Oralis<br>(789)       | VT162<br>(684)            | VT162<br>(241)            | Oralis<br>(241)      | VT162<br>(592)         | Strep sp. VT162            |
| 21    | Oralis<br>(338)       | VT162<br>(495)        | Oralis<br>(818)       | < (50)                    | VT162<br>(107)            | VT162<br>(100)       | VT162<br>(609)         | Strep sp. VT162            |
| 22    | VT162/Oralis<br>(500) | VT162<br>(535)        | VT162<br>(769)        | VT162<br>(187)            | < (50)                    | < (50)               | Oralis<br>(522)        | Strep sp. VT162            |
| 23    | VT162<br>(479)        | VT162/Oralis<br>(515) | VT162<br>(767)        | Mitis<br>(122)            | VT162<br>(639)            | Oralis<br>(190)      | VT162<br>(569)         | Strep sp. VT162            |
| 24    | Anginosus<br>(313)    | Mitis<br>(489)        | Pseudopneumo<br>(594) | < (50)                    | VT162<br>(145)            | Mitis<br>(149)       | Parasanguinis<br>(551) | Uncertain                  |
| 25    | Anginosus<br>(544)    | Anginosus<br>(535)    | VT162<br>(178)        | Anginosus<br>(648)        | Anginosus<br>(812)        | Anginosus<br>(533)   | Anginosus<br>(670)     | <i>S. anginosus</i>        |
| 26    | VT162/Oralis<br>(506) | VT162<br>(549)        | VT162<br>(830)        | VT162<br>(331)            | VT162<br>(783)            | Oralis<br>(432)      | VT162<br>(664)         | Strep sp. VT162            |
| 27    | VT162/Oralis<br>(493) | VT162<br>(535)        | VT162<br>(818)        | VT162<br>(645)            | < (50)                    | Oralis<br>(497)      | Oralis<br>(677)        | Strep sp. VT162            |
| 28    | Intermedius<br>(542)  | Intermedius<br>(551)  | Intermedius<br>(960)  | Intermedius<br>(563)      | Intermedius<br>(818)      | Intermedius<br>(452) | Intermedius<br>(681)   | <i>S. intermedius</i>      |
| 29    | Oralis<br>(524)       | VT162<br>(540)        | VT162<br>(794)        | VT162<br>(594)            | Oralis<br>(774)           | Mitis<br>(277)       | VT162<br>(652)         | Strep sp. VT162            |
| 30    | Oralis<br>(488)       | VT162/Oralis<br>(526) | Oralis<br>(794)       | VT162<br>(589)            | VT162<br>(765)            | VT162<br>(291)       | VT162<br>(659)         | Strep sp. VT162            |
| 31    | VT162<br>(502)        | VT162<br>(549)        | VT162<br>(843)        | VT162<br>(600)            | VT162/Oralis<br>(731)     | VT162<br>(347)       | VT162<br>(675)         | Strep sp. VT162            |
| 32    | Oralis<br>(389)       | Gordonii<br>(459)     | Mitis<br>(493)        | Gordonii<br>(695)         | Gordonii<br>(650)         | No Product           | Gordonii<br>(636)      | <i>S. gordonii</i>         |
|       |                       |                       |                       |                           |                           |                      |                        |                            |
| GDH2+ | <i>map</i>            | <i>pfl</i>            | <i>ppaC</i>           | <i>pyk</i>                | <i>ropB</i>               | <i>sodA</i>          | <i>tuf</i>             | Species Assignment         |
| 1     | Pseudopneumo<br>(109) | Pneumoniae<br>(488)   | Pneumoniae<br>(223)   | < (50)                    | Mitis<br>(558)            | Mitis<br>(214)       | Pseudopneumo<br>(648)  | Mitis/Pseudo/Pneumo        |
| 2     | Mitis<br>(140)        | Pneumoniae<br>(210)   | Mitis<br>(800)        | Mitis<br>(298)            | Mitis<br>(569)            | Pneumoniae<br>(302)  | Pseudopneumo<br>(583)  | <i>S. mitis</i>            |
| 3     | Mitis<br>(253)        | Pneumoniae<br>(515)   | Pneumoniae<br>(733)   | Mitis<br>(280)            | Mitis<br>(295)            | Pneumoniae<br>(304)  | Pseudopneumo<br>(659)  | <i>S. mitis/pneumoniae</i> |
| 4     | Mitis<br>(455)        | Pneumoniae<br>(450)   | Mitis<br>(360)        | Pseudopn./Pneumo<br>(100) | Pseudopn./Pneumo<br>(228) | Pneumoniae<br>(132)  | Pseudopneumo<br>(522)  | Mitis/Pseudo/Pneumo        |

|      |                       |                           |                       |                       |                           |                     |                          |                            |
|------|-----------------------|---------------------------|-----------------------|-----------------------|---------------------------|---------------------|--------------------------|----------------------------|
| 5    | Mitis<br>(123)        | Pseudopn./Pneumo<br>(390) | Pseudopneumo<br>(336) | Gordonii<br>(95)      | Mitis<br>(576)            | I-G2/I-P16<br>(138) | Pseudopn./Mitis<br>(520) | <i>S. pseudopn./mitis</i>  |
| 6    | Pseudopneumo<br>(109) | Pseudopneumo<br>(471)     | Pneumoniae<br>(475)   | < (50)                | Pseudopneumo<br>(369)     | < (50)              | Pseudopn./Mitis<br>(639) | <i>S. pseudopneumoniae</i> |
| 7    | Pseudopneumo<br>(170) | Mitis<br>(482)            | Mitis<br>(713)        | Mitis<br>(239)        | Mitis<br>(178)            | Mitis<br>(107)      | Pseudopneumo<br>(641)    | <i>S. mitis</i>            |
| 8    | < (50)                | Pseudopn./Pneumo<br>(484) | Mitis<br>(464)        | Pseudopneumo<br>(136) | Mitis<br>(159)            | VT162/Mitis<br>(79) | Mitis<br>(637)           | <i>S. mitis</i>            |
| 9    | Pneumoniae<br>(149)   | Pseudopneumo<br>(403)     | Pseudopneumo<br>(585) | < (50)                | Pseudopneumo<br>(255)     | Pneumoniae<br>(145) | Pseudopneumo<br>(623)    | <i>S. pseudopneumoniae</i> |
| 10   | Mitis<br>(105)        | Pseudopneumo<br>(443)     | Mitis<br>(513)        | < (50)                | Pseudopn./Pneumo<br>(349) | < (50)              | Mitis<br>(583)           | <i>S. mitis</i>            |
| 11   | Mitis<br>(185)        | Pneumoniae<br>(336)       | Pneumoniae<br>(540)   | < (50)                | Pneumoniae<br>(320)       | Mitis<br>(141)      | Mitis<br>(639)           | <i>S. mitis/pneumoniae</i> |
| 12   | Pneumoniae<br>(389)   | Pseudopneumo<br>(428)     | Pneumoniae<br>(396)   | Mitis<br>(372)        | Mitis<br>(661)            | Pneumoniae<br>(174) | Mitis<br>(661)           | <i>S. mitis/pneumoniae</i> |
| 13   | Mitis<br>(477)        | Pneumoniae<br>(527)       | Pneumo/Mitis<br>(499) | Mitis<br>(672)        | Pseudopn./Mitis<br>(100)  | Mitis<br>(445)      | Pseudopneumo<br>(535)    | <i>S. mitis</i>            |
| 14   | Mitis<br>(482)        | Pneumoniae<br>(518)       | Mitis<br>(857)        | Mitis<br>(569)        | Pseudopneumo<br>(769)     | Mitis<br>(407)      | VT162<br>(621)           | <i>S. mitis</i>            |
|      |                       |                           |                       |                       |                           |                     |                          |                            |
| GDH0 | <i>map</i>            | <i>pfl</i>                | <i>ppaC</i>           | <i>pyk</i>            | <i>ropB</i>               | <i>sodA</i>         | <i>tuf</i>               | Species<br>Assignment      |
| 1    | Gordonii<br>(517)     | Gordonii<br>(493)         | Gordonii<br>(960)     | Intermedius<br>(55)   | Gordonii<br>(711)         | Gordonii<br>(300)   | Gordonii<br>(679)        | <i>S. gordonii</i>         |
| 2    | No Product            | Mutans<br>(437)           | Mutans<br>(960)       | Mutans<br>(257)       | Mutans<br>(816)           | No Product          | Mutans<br>(681)          | <i>S. mutans</i>           |
| 3    | No Product            | Mutans<br>(430)           | Mutans<br>(966)       | Mutans<br>(417)       | Mutans<br>(778)           | No Product          | Mutans<br>(681)          | <i>S. mutans</i>           |
| 4    | Sanguinis<br>(540)    | Sanguinis<br>(372)        | Sanguinis<br>(940)    | < (50)                | Sanguinis<br>(800)        | No Product          | Sanguinis<br>(684)       | <i>S. sanguinis</i>        |
| 5    | No Product            | No Product                | No Product            | No Product            | No Product                | No Product          | No Product               | Indeterminate              |
| 6    | Sanguinis<br>(466)    | Sanguinis<br>(385)        | Sanguinis<br>(839)    | VT162<br>(50)         | Gordonii<br>(690)         | Sanguinis<br>(345)  | Sanguinis<br>(661)       | <i>S. sanguinis</i>        |
| 7    | No Product            | No Product                | No Product            | No Product            | No Product                | No Product          | No Product               | Indeterminate              |
| 8    | Sanguinis<br>(489)    | Sanguinis<br>(378)        | Sanguinis<br>(832)    | Sanguinis<br>(581)    | Sanguinis<br>(688)        | No Product          | Sanguinis<br>(673)       | <i>S. sanguinis</i>        |
| 9    | No Product            | Mutans                    | Mutans                | < (50)                | Mutans                    | No Product          | Mutans                   | <i>S. mutans</i>           |

|    |                     |                     |                     |                     |                     |                     |                     |                      |
|----|---------------------|---------------------|---------------------|---------------------|---------------------|---------------------|---------------------|----------------------|
|    |                     | (208)               | (960)               |                     | (805)               |                     | (681)               |                      |
| 10 | No Product          | Mutans<br>(435)     | Mutans<br>(966)     | Mutans<br>(677)     | Sanguinis<br>(710)  | No Product          | Mutans<br>(690)     | <i>S. mutans</i>     |
| 11 | Gordonii<br>(471)   | Gordonii<br>(533)   | Gordonii<br>(801)   | Gordonii<br>(590)   | Gordonii<br>(782)   | Gordonii<br>(508)   | Gordonii<br>(636)   | <i>S. gordonii</i>   |
| 12 | Salivarius<br>(522) | Salivarius<br>(482) | No Product          | Salivarius<br>(693) | No Product          | Salivarius<br>(480) | Salivarius<br>(668) | <i>S. salivarius</i> |
| 13 | Gordonii<br>(468)   | Gordonii<br>(464)   | Gordonii<br>(834)   | Gordonii<br>(506)   | Gordonii<br>(783)   | Gordonii<br>(535)   | Gordonii<br>(654)   | <i>S. gordonii</i>   |
| 14 | No Product          | No Product          | No Product          | No Product          | No Product          | No Product          | No Product          | Indeterminate        |
| 15 | Salivarius<br>(509) | Salivarius<br>(495) | Salivarius<br>(852) | Salivarius<br>(183) | Salivarius<br>(791) | Salivarius<br>(461) | Salivarius<br>(677) | <i>S. salivarius</i> |
| 16 | No Product          | Mutans<br>(430)     | Mutans<br>(827)     | Mutans<br>(176)     | Mutans<br>(812)     | No Product          | Mutans<br>(681)     | <i>S. mutans</i>     |
| 17 | No Product          | Mutans<br>(230)     | Mutans<br>(955)     | Mutans<br>(464)     | Mutans<br>(825)     | No Product          | Mutans<br>(690)     | <i>S. mutans</i>     |
| 18 | No Product          | Mutans<br>(464)     | Mutans<br>(419)     | Mutans<br>(695)     | Mutans<br>(823)     | No Product          | Mutans<br>(690)     | <i>S. mutans</i>     |
| 19 | No Product          | Mutans<br>(517)     | Mutans<br>(960)     | Mutans<br>(682)     | Mutans<br>(816)     | No Product          | Mutans<br>(690)     | <i>S. mutans</i>     |
| 20 | No Product          | Mutans<br>(405)     | Mutans<br>(807)     | Mutans<br>(666)     | Mutans<br>(823)     | No Product          | Mutans<br>(681)     | <i>S. mutans</i>     |

Supplementary Figure 1

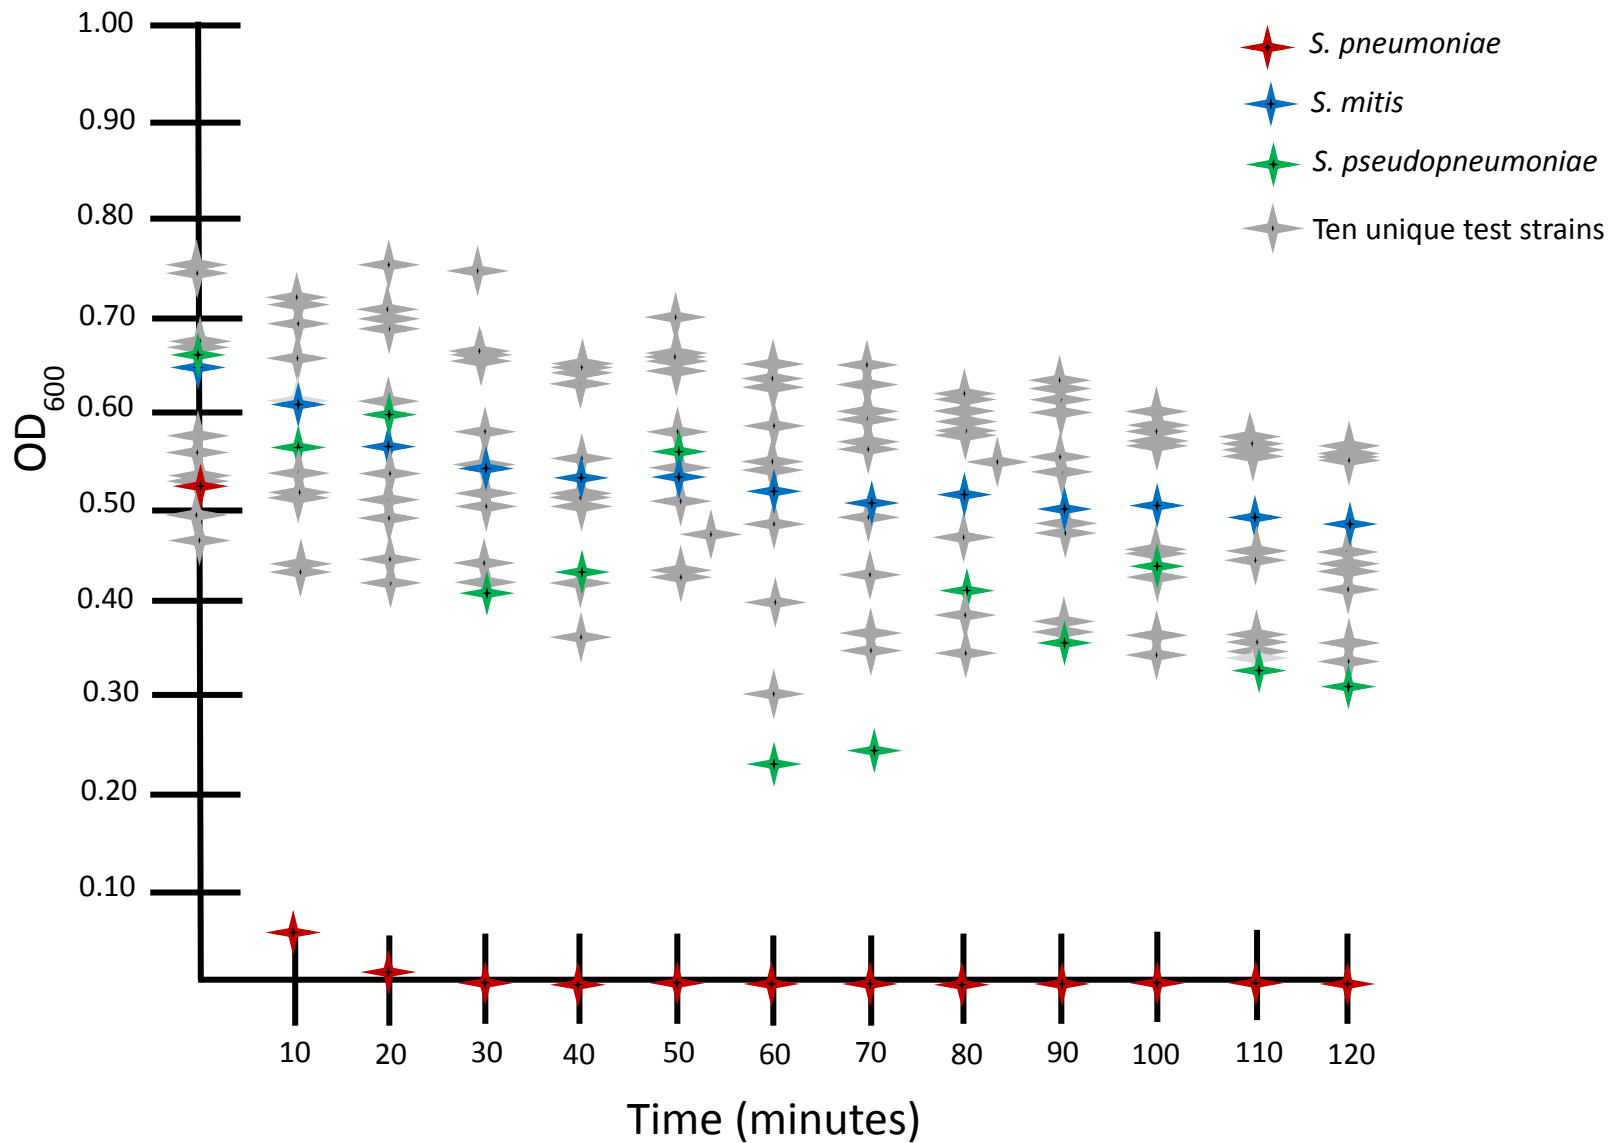

Putative *S. mitis* strains that showed strong homology with *S. pneumoniae* or *S. pseudopneumoniae* via MLSA, were tested for lysis by sodium deoxycholate. Only *S. pneumoniae* should lyse and exhibit an optical density (OD) near 0. A control strain of *S. pneumoniae*

showed complete lysis by 20 minutes whereas control strains of *S. mitis* and *S. pseudopneumoniae*, along with 10 suspected *S. mitis* strains, showed only partial or negligible lysis.
